# Supplementary material for: A conductive interwoven bamboo carbon fiber membrane for Li–S batteries
Source: Royal Society of Chemistry journal article supplement (doi:10.1039/c5ta00681c), 2015-01-01
Supplement: c5ta00681c1.pdf [file c5ta00681c1.pdf]

Electronic Supplementary Material (ESI) for Journal of Materials Chemistry A.

This journal is © The Royal Society of Chemistry 2015

Supporting Information for

## **Interwoven carbonized bamboo fibers membrane for Li–S batteries**

Xingxing Gu,<sup>ab</sup> Chao Lai,<sup>a</sup> Fei Liu,<sup>b</sup> Wenlong Yang,<sup>b</sup> Yanglong Hou,\*<sup>b</sup> and Shanqing Zhang\*<sup>a</sup>

<sup>a</sup> Centre for Clean Environment and Energy, Environmental Futures Institute, and Griffith School of Environment, Gold Coast Campus, Griffith University QLD 4222, Australia. E-mail: s.zhang@griffith.edu.au

<sup>b</sup> Department of Materials Science and Engineering, College of Engineering, Peking University, Beijing 100871, China. E-mail: hou@pku.edu.cn

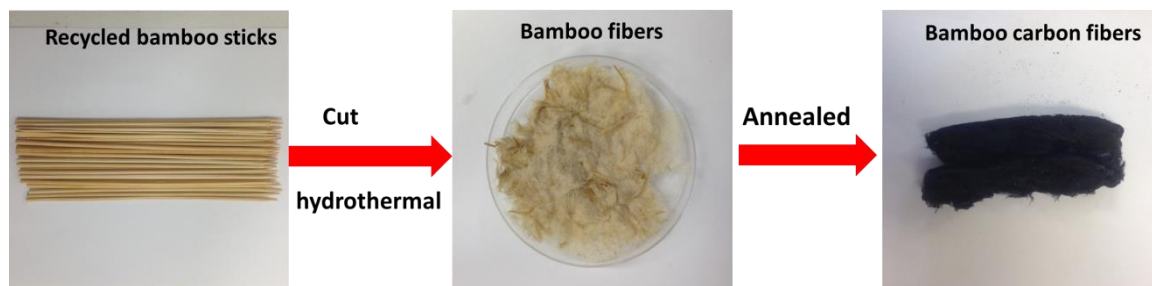

Fig. S1 Digital graphs of recycled bamboo sticks, bamboo fibers and BCFs

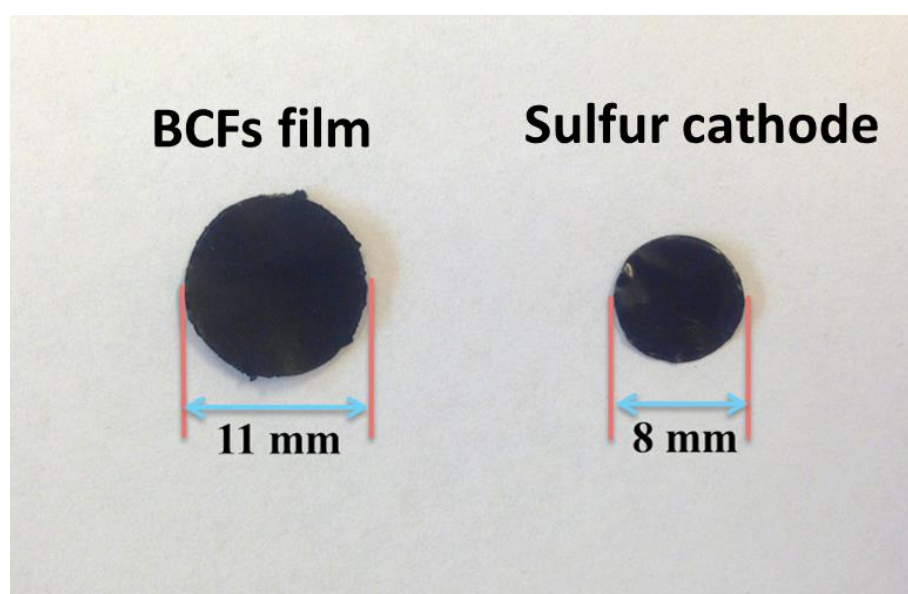

Fig. S2 Images of BCFs interlayer and sulfur cathode.
